# Supplementary material for: Sn14O11Br6: a promising birefringent material with a [Sn14O11Br6] layer
Source: Royal Society of Chemistry journal article supplement (doi:10.1039/d0tc05942k), 2021-01-01
Supplement: d0tc05942k1.pdf [file d0tc05942k1.pdf]

## Electronic Supplementary Information

### **Sn<sub>14</sub>O<sub>11</sub>Br<sub>6</sub>: A promising birefringent material with [Sn<sub>14</sub>O<sub>11</sub>Br<sub>6</sub>] layer**

Zixiu Lu,<sup>a,b</sup> Fangfang Zhang,<sup>a,b,\*</sup> Abudukadi Tudi,<sup>a,b</sup> Zhihua Yang,<sup>a,b</sup> Zijian Li<sup>a,b</sup> and  
Shilie Pan<sup>a,b,\*</sup>

<sup>a</sup>CAS Key Laboratory of Functional Materials and Devices for Special Environments;  
Xinjiang Technical Institute of Physics & Chemistry, CAS; Xinjiang Key Laboratory  
of Electronic Information Materials and Devices, 40-1 South Beijing Road, Urumqi  
830011, China.

<sup>b</sup>Center of Materials Science and Optoelectronics Engineering, University of Chinese  
Academy of Sciences, Beijing 100049, China.

\*Corresponding authors: ffzhang@ms.xjb.ac.cn; slpan@ms.xjb.ac.cn.

**Table S2.** Atomic coordinates and equivalent isotropic displacement parameter for Sn<sub>14</sub>O<sub>11</sub>Br<sub>6</sub>.

| Atoms | <i>x</i> | <i>y</i> | <i>z</i> | $U_{(eq)}^*$ |
|-------|----------|----------|----------|--------------|
| Sn1   | 7363(1)  | 902(1)   | 7474(1)  | 15(1)        |
| Sn2   | 5645(1)  | 7944(1)  | 7486(1)  | 16(1)        |
| Sn3   | 1691(1)  | 9127(1)  | 7497(1)  | 15(1)        |
| Sn4   | 335(1)   | 6195(1)  | 7538(1)  | 16(1)        |
| Sn5   | 8552(1)  | 3693(1)  | 7466(1)  | 14(1)        |
| Sn6   | 3117(1)  | 2228(1)  | 7536(1)  | 14(1)        |
| Sn7   | 4263(1)  | 5364(1)  | 6675(1)  | 20(1)        |
| Sn8   | 4622(1)  | 4682(1)  | 8325(1)  | 21(1)        |
| Sn9   | 1782(1)  | 3042(1)  | 9290(1)  | 20(1)        |
| Sn10  | 8338(1)  | 2708(1)  | 5721(1)  | 18(1)        |
| Sn11  | 9052(1)  | 1275(1)  | 9211(1)  | 18(1)        |
| Sn12  | 12880(1) | 3(1)     | 5730(1)  | 20(1)        |
| Sn13  | 11090(1) | 4503(1)  | 5791(1)  | 18(1)        |
| Sn14  | 3622(1)  | 8507(1)  | 9256(1)  | 18(1)        |
| O1    | 3821(5)  | 8146(5)  | 8213(2)  | 15(1)        |
| O2    | 5904(5)  | 5451(5)  | 7487(2)  | 12(1)        |
| O3    | 10792(5) | 2318(5)  | 5969(2)  | 17(1)        |
| O4    | 3514(5)  | 8766(5)  | 6779(2)  | 15(1)        |
| O5    | 1961(5)  | 3918(5)  | 8248(2)  | 14(1)        |
| O6    | 1458(5)  | 11025(5) | 9024(2)  | 16(1)        |
| O7    | 4882(5)  | 3117(5)  | 7505(2)  | 14(1)        |
| O8    | 2566(5)  | 6470(5)  | 7507(2)  | 13(1)        |
| O9    | 7722(6)  | 2679(5)  | 6757(2)  | 16(1)        |
| O10   | 8064(5)  | 2051(5)  | 8181(2)  | 15(1)        |
| O11   | 1641(5)  | 4500(5)  | 6819(2)  | 15(1)        |
| Br1   | 5541(1)  | 10258(1) | 9032(1)  | 24(1)        |
| Br2   | 10019(1) | -993(1)  | 5972(1)  | 24(1)        |
| Br3   | -1868(1) | 5030(1)  | 9021(1)  | 25(1)        |
| Br4   | 7467(1)  | 6426(1)  | 5979(1)  | 25(1)        |
| Br5   | 10666(1) | -2299(1) | 9016(1)  | 24(1)        |
| Br6   | 14803(1) | 1628(1)  | 5977(1)  | 25(1)        |

$U_{(eq)}^*$  is defined as one third of the trace of the orthogonalized  $U_{ij}$  tensor.

**Table S3.** Selected bond lengths [ $\text{\AA}$ ] and angles [deg] for  $\text{Sn}_{14}\text{O}_{11}\text{Br}_6$ .

|            |           |                            |           |
|------------|-----------|----------------------------|-----------|
| Sn1-O9     | 2.139(4)  | Sn8-O8                     | 2.226(4)  |
| Sn1-O10    | 2.133(4)  | Sn8-O2                     | 2.239(4)  |
| Sn1-O7     | 2.180(4)  | Sn8-O7                     | 2.242(4)  |
| Sn2-O4     | 2.131(4)  | Sn9-O5                     | 2.104(4)  |
| Sn2-O1     | 2.143(4)  | Sn9-O6 <sup>#1</sup>       | 2.153(4)  |
| Sn2-O2     | 2.183(4)  | Sn9-Br3                    | 2.912(9)  |
| Sn3-O4     | 2.107(4)  | Sn10-O9                    | 2.094(4)  |
| Sn3-O1     | 2.115(4)  | Sn10-O3                    | 2.145(4)  |
| Sn3-O8     | 2.155(4)  | Sn10-Br2                   | 2.910(8)  |
| Sn4-O11    | 2.147(4)  | Sn11-O10                   | 2.074(4)  |
| Sn4-O5     | 2.135(4)  | Sn11-O6 <sup>#2</sup>      | 2.141(4)  |
| Sn4-O8     | 2.186(4)  | Sn11-Br5                   | 2.942(8)  |
| Sn5-O9     | 2.113(4)  | Sn12-O4 <sup>#4</sup>      | 2.111(4)  |
| Sn5-O10    | 2.111(4)  | Sn12-O3                    | 2.155(4)  |
| Sn5-O2     | 2.152(4)  | Sn12-Br6                   | 2.907(8)  |
| Sn6-O5     | 2.112(4)  | Sn13-O11 <sup>#3</sup>     | 2.067(4)  |
| Sn6-O11    | 2.113(4)  | Sn13-O3                    | 2.138(4)  |
| Sn6-O7     | 2.146(4)  | Sn13-Br4                   | 2.943(8)  |
| Sn7-O7     | 2.245(4)  | Sn14-O1                    | 2.101(4)  |
| Sn7-O8     | 2.233(4)  | Sn14-O6                    | 2.150(4)  |
| Sn7-O2     | 2.229(4)  | Sn14-Br1                   | 2.916(8)  |
| <hr/>      |           |                            |           |
| O9-Sn1-O7  | 82.96(16) | O2-Sn8-O7                  | 75.22(14) |
| O10-Sn1-O7 | 82.17(16) | O8-Sn8-O2                  | 75.26(15) |
| O10-Sn1-O9 | 79.56(15) | O8-Sn8-O7                  | 75.59(14) |
| O1-Sn2-O2  | 82.27(15) | O5-Sn9-O6 <sup>#1</sup>    | 93.30(16) |
| O4-Sn2-O1  | 80.16(16) | O5-Sn9-Br3                 | 88.19(12) |
| O4-Sn2-O2  | 82.59(15) | O6 <sup>#1</sup> -Sn9-Br3  | 83.40(11) |
| O1-Sn3-O8  | 83.09(15) | O3-Sn10-Br2                | 84.74(11) |
| O4-Sn3-O1  | 81.36(16) | O9-Sn10-O3                 | 93.97(17) |
| O4-Sn3-O8  | 84.11(16) | O9-Sn10-Br2                | 88.84(11) |
| O5-Sn4-O8  | 82.83(15) | O6 <sup>#2</sup> -Sn11-Br5 | 84.82(11) |
| O5-Sn4-O11 | 79.70(15) | O10-Sn11-O6 <sup>#2</sup>  | 96.98(16) |

Symmetry transformations used to generate equivalent atoms:

#1  $x, y - 1, z$    #2  $x + 1, y - 1, z$    #3  $x + 1, y, z$   
#4  $x - 1, y + 1, z$    #5  $x, y + 1, z$    #6  $x - 1, y, z$

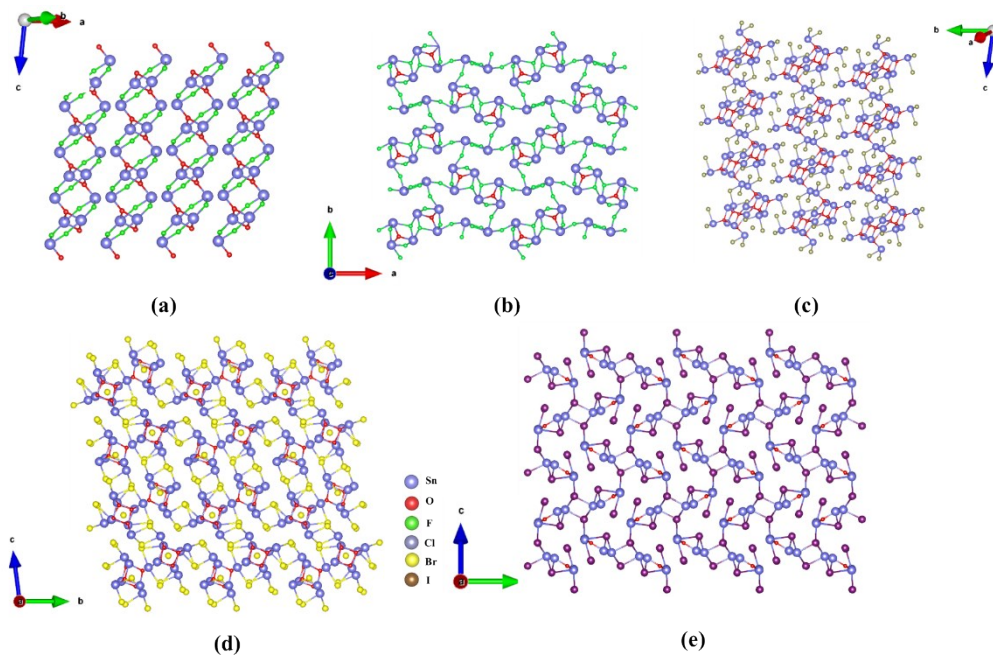

**Figure S1** (a)  $[\text{Sn}_4\text{O}_2\text{F}_4]$  infinite chains of  $\text{Sn}_2(\text{SnOF}_2)_2$ ; (b) 3D  $[\text{Sn}_4\text{OF}_6]$  framework of  $\text{Sn}_4\text{OF}_6$ ; (c)  $[\text{Sn}_{14}\text{O}_8\text{Cl}_{10}]$  infinite chains of  $\text{Sn}_7\text{O}_4\text{Cl}_6$ ; (d) 3D  $[\text{Sn}_7\text{O}_4\text{Br}_6]$  framework of  $\text{Sn}_7\text{O}_4\text{Br}_6$ ; (e) 3D  $[\text{Sn}_4\text{OI}_6]$  framework of  $\text{Sn}_4\text{OI}_6$ .

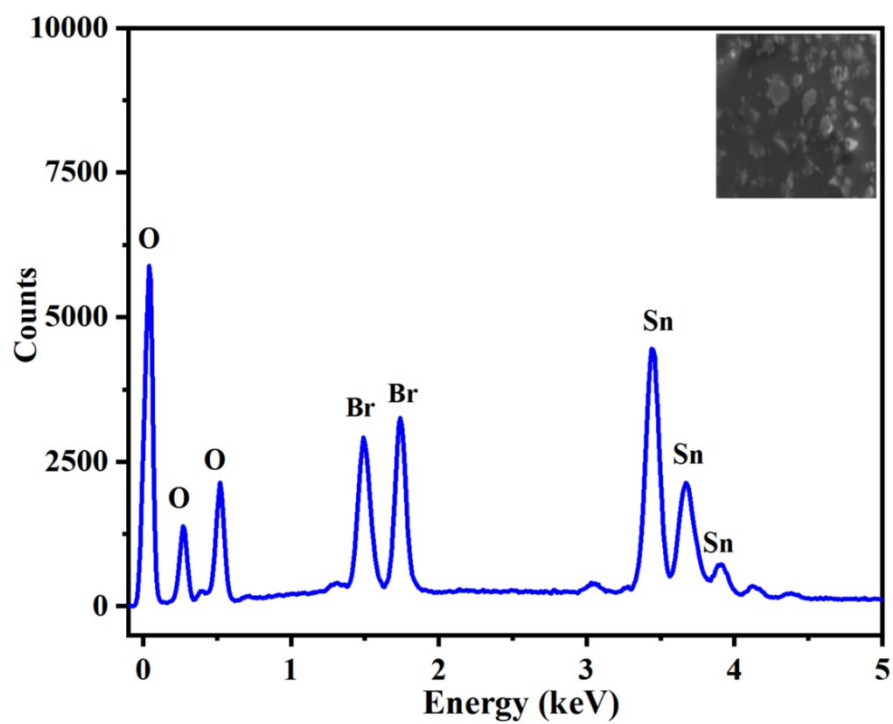

Figure S2 EDX analysis of  $\text{Sn}_{14}\text{O}_{11}\text{Br}_6$ .

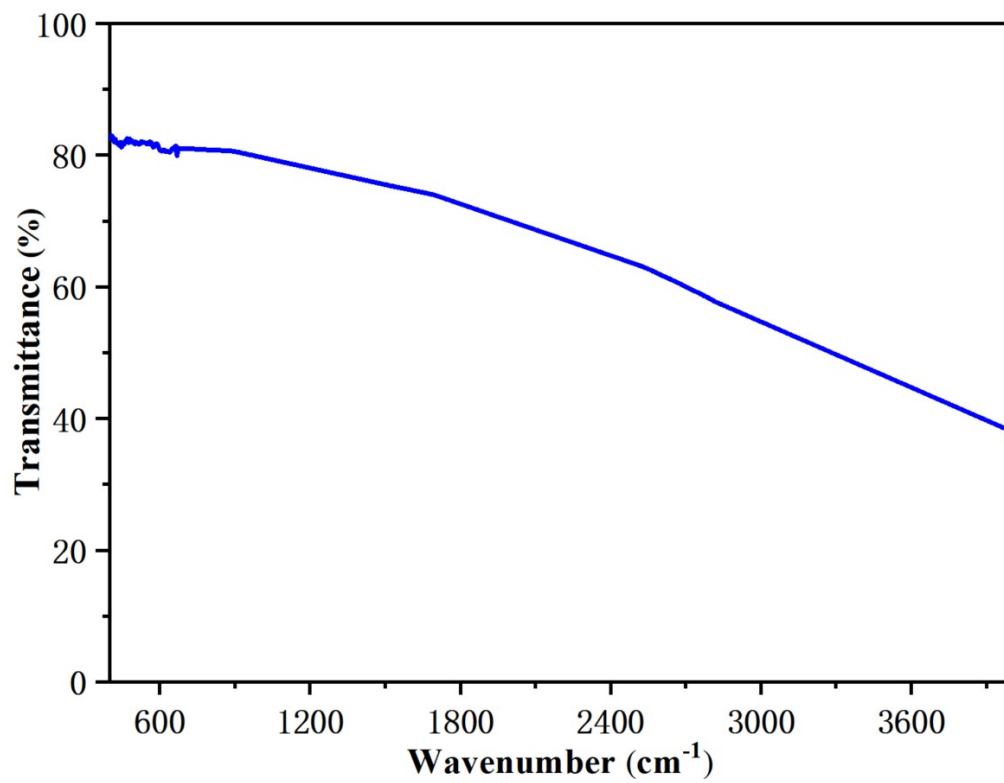

e S3 IR Spectroscopy of Sn<sub>14</sub>O<sub>11</sub>Br<sub>6</sub>.

Figur

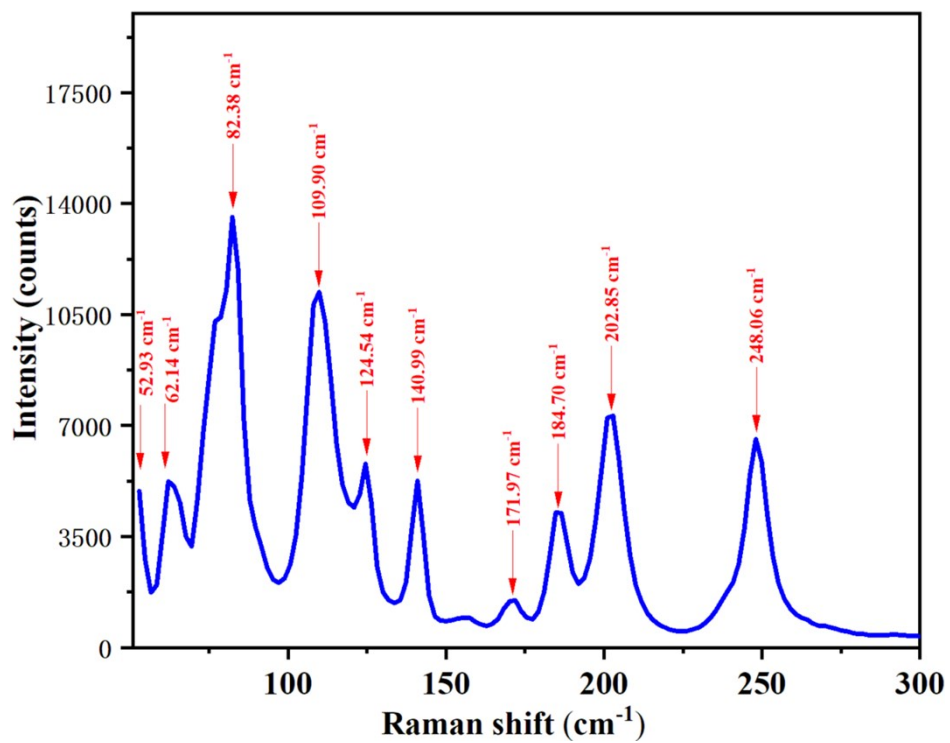

Figure S4 Raman spectroscopy of Sn<sub>14</sub>O<sub>11</sub>Br<sub>6</sub>.

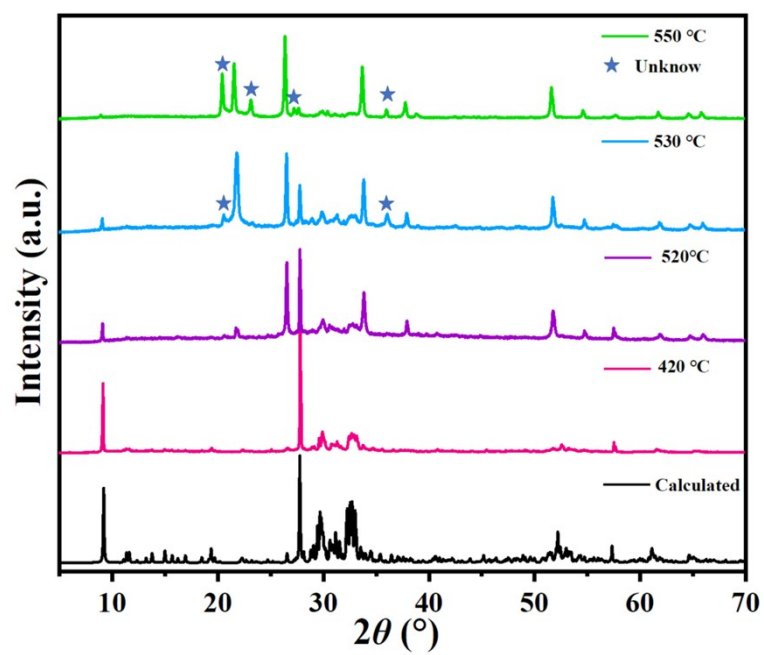

**Figure S5** Powder XRD patterns of  $\text{Sn}_{14}\text{O}_{11}\text{Br}_6$  at 420, 520, 530 and 550 °C, respectively.



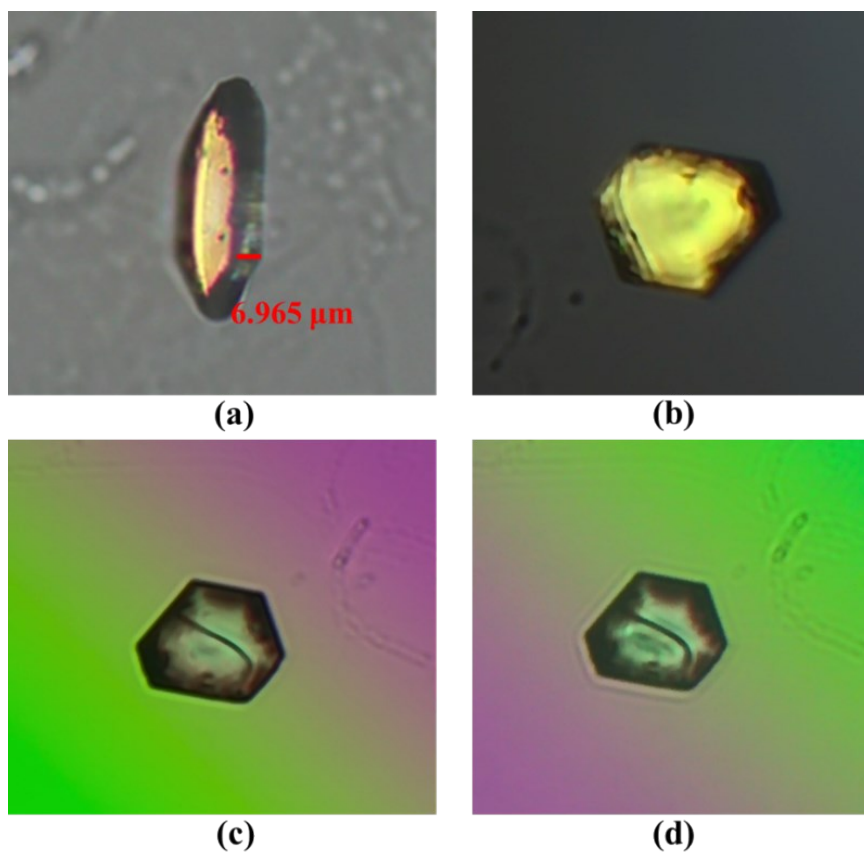

**Figure S6** (a) A plate-shaped TOB crystal with a thickness of 6.965 μm; (b) The interference color of TOB crystal under the polarizing microscope; The TOB crystal in the left (c) and right (d) subtraction position.

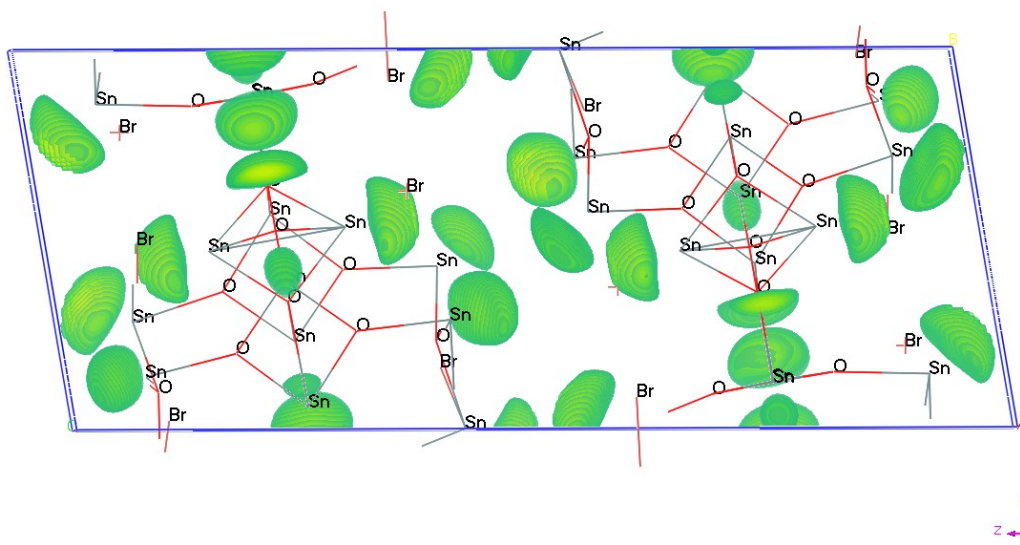

**Figure S7** Electron localization function diagrams of the Sn-O/Br polyhedra in TOB.
